# Supplementary material for: Integrated 3D self-supported Ni decorated MoO2 nanowires as highly efficient electrocatalysts for ultra-highly stable and large-current-density hydrogen evolution
Source: Royal Society of Chemistry journal article supplement (doi:10.1039/c7ta08090e), 2017-01-01
Supplement: c7ta08090e1.pdf [file c7ta08090e1.pdf]

## Supporting Information

### **Integrated 3D self-supported Ni decorated MoO<sub>2</sub> nanowires as highly efficient electrocatalysts for ultra-highly stable and large-current-density hydrogen evolution**

*Bowen Ren, Dongqi Li, Qiuyan Jin, Hao Cui,\* and Chengxin Wang\**

*State Key Laboratory of Optoelectronic Materials and Technologies, School of Materials Science and Engineering, Sun Yat-sen (Zhongshan) University, Guangzhou 510275, China*

*The Key Laboratory of Low-Carbon Chemistry & Energy Conservation of Guangdong Province, Sun Yat-sen (Zhongshan) University, Guangzhou 510275, China*

\*Corresponding author: Fax: +86-20-8411-3901; e-mail: wchengx@mail.sysu.edu.cn;

cuihao3@mail.sysu.edu.cn

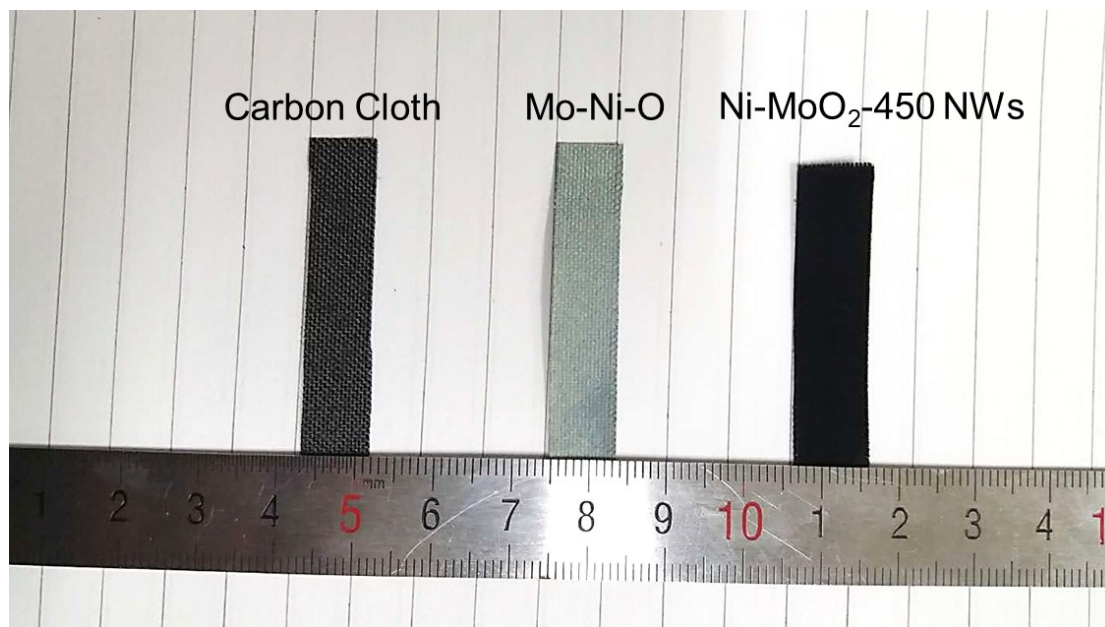

**Figure S1.** Optical photograph of bare CC (left), Mo-Ni-O based precursors (middle), and Ni-MoO<sub>2</sub>-450 NWs/CC (right).

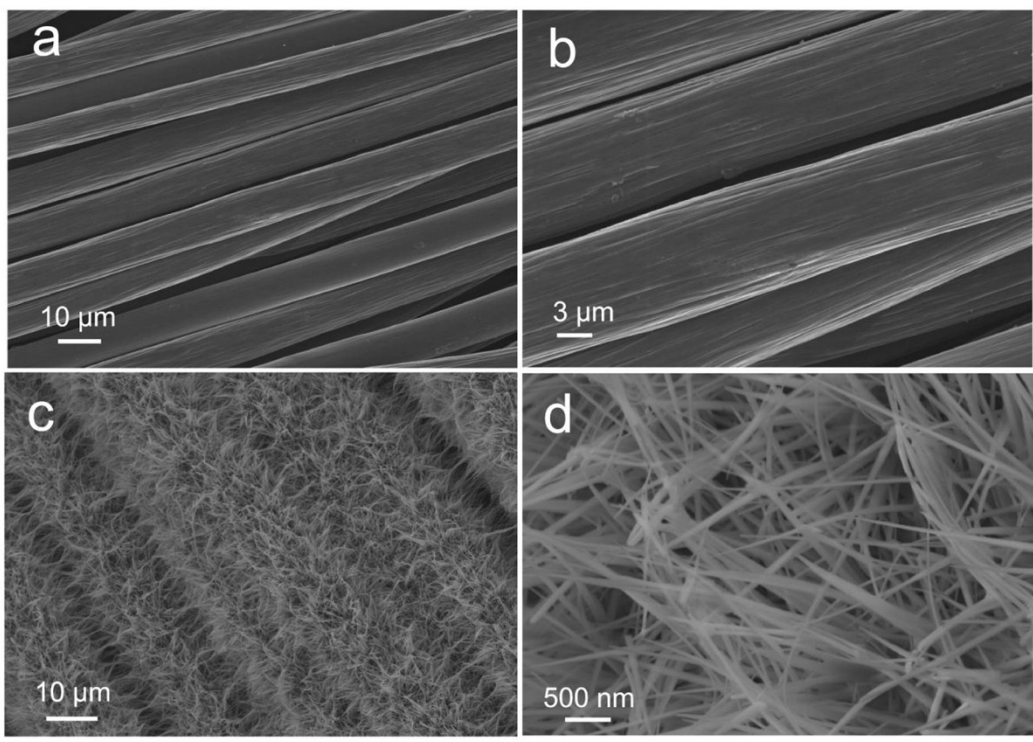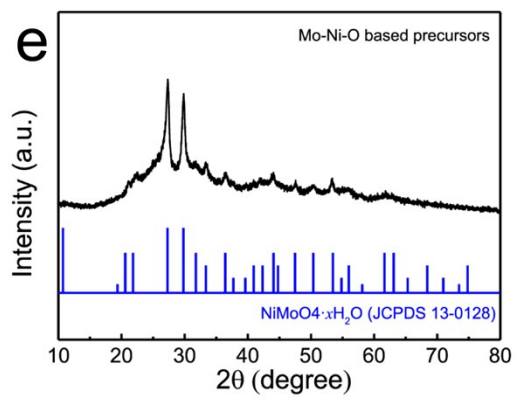

**Figure S2.** a) Low- and b) high-magnification SEM images of carbon cloth. c) Low- and d) high-magnification SEM images of Mo-Ni-O based precursors. e) XRD pattern of Mo-Ni-O based precursors.

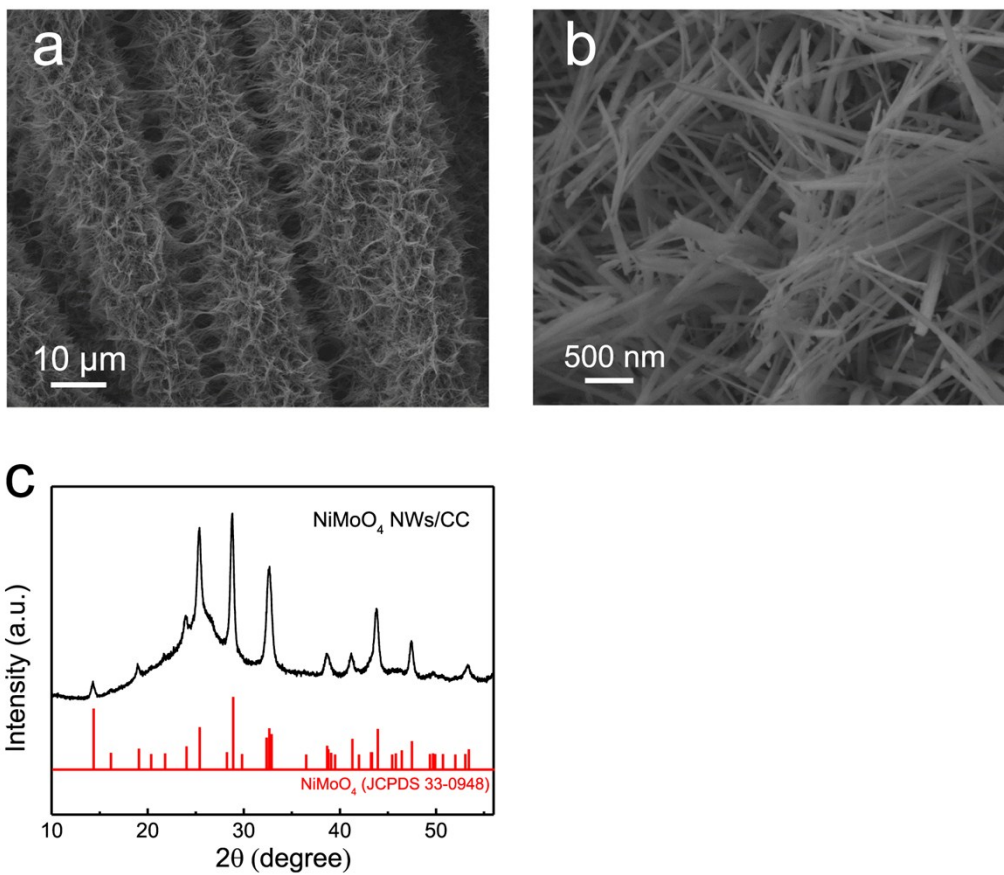

**Figure S3.** a) Low- and b) high-magnification SEM images of NiMoO<sub>4</sub> NWs/CC. c) XRD pattern of NiMoO<sub>4</sub> NWs/CC.

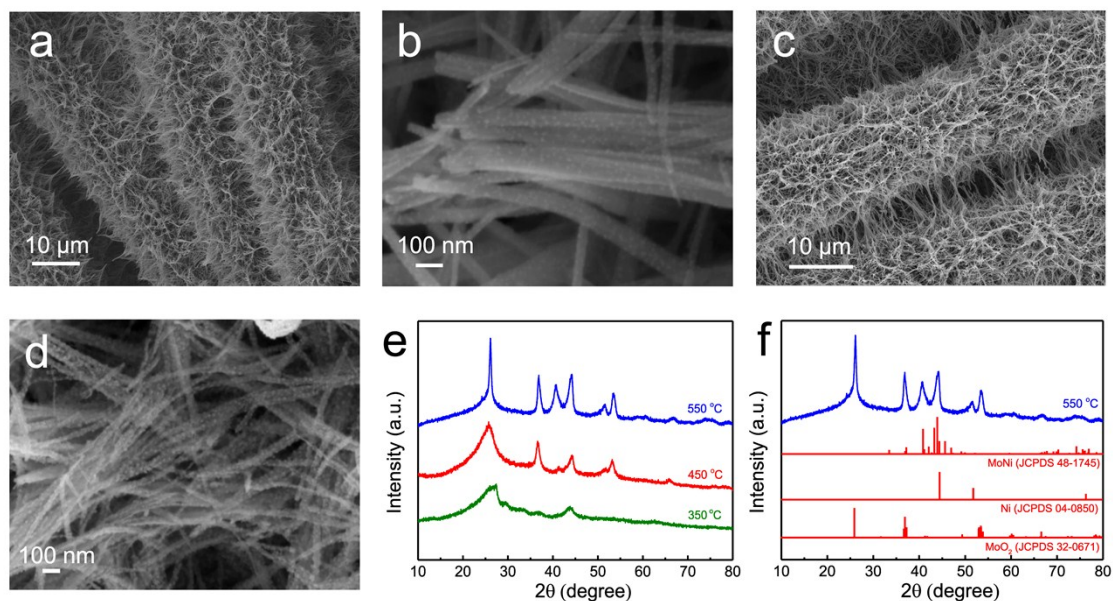

**Figure S4.** a) Low- and b) high-magnification SEM images of Ni-MoO<sub>2</sub>-350 NWs/CC. c) Low- and d) high-magnification SEM images of Ni-MoO<sub>2</sub>-550 NWs/CC. e) XRD pattern of Ni-MoO<sub>2</sub> NWs/CC annealed at different temperature. f) XRD pattern of Ni-MoO<sub>2</sub>-550 NWs/CC with the standard crystallographic spectrum of MoNi (JCPDS 48-1745), Ni (JCPDS 04-0850) and MoO<sub>2</sub> (JCPDS 32-0671).

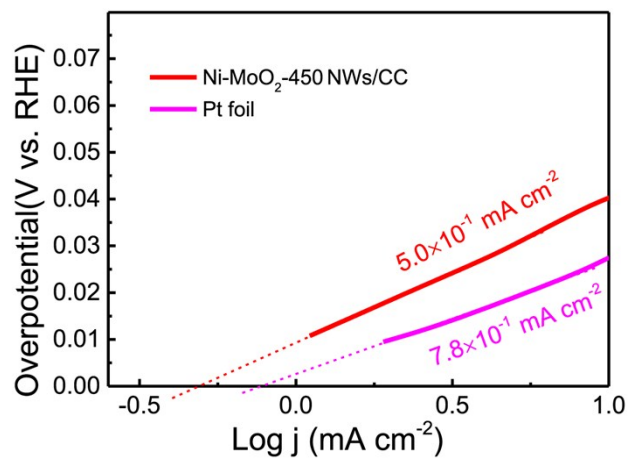

**Figure S5.** Exchange current densities for Ni-MoO<sub>2</sub>-450 NWs/CC and Pt foil in 1 M KOH, which were calculated from Tafel plots by extrapolation method.

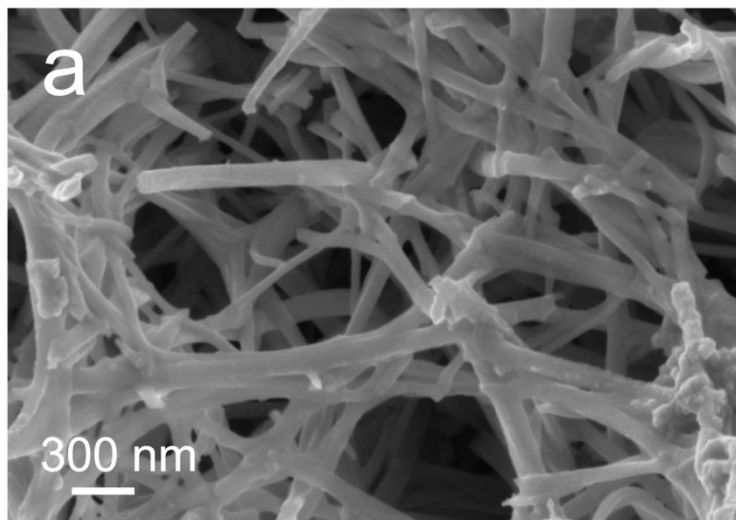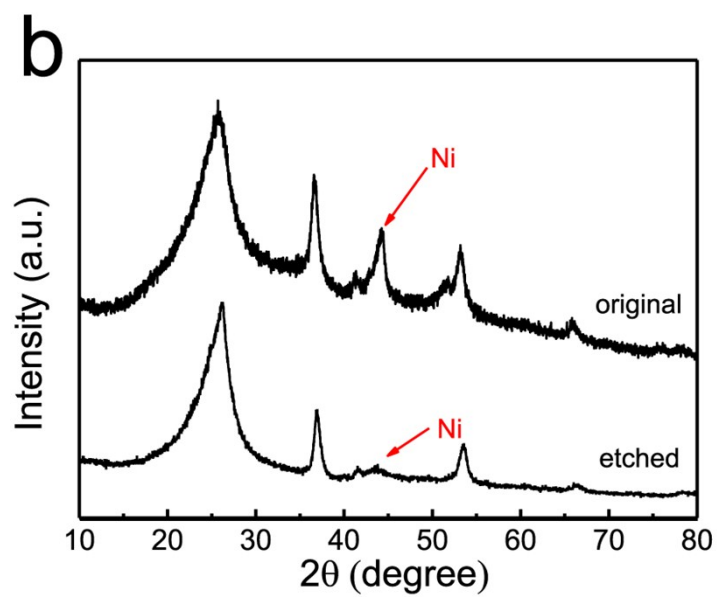

**Figure S6.** a) SEM image and b) XRD pattern of ETH-Ni-MoO<sub>2</sub>-450 NWs/CC.

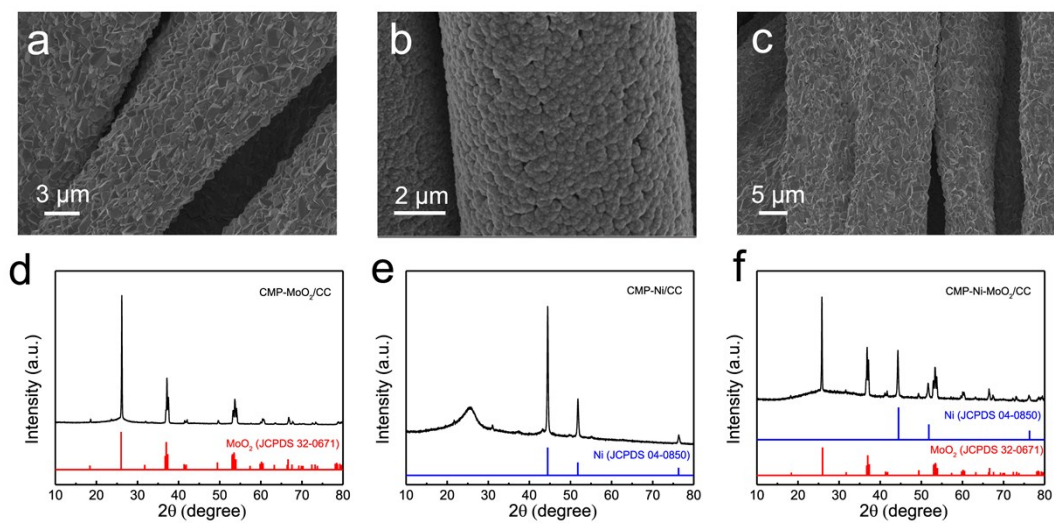

**Figure S7.** SEM images of a) CMP-MoO<sub>2</sub>/CC, b) CMP-Ni /CC, and c) CMP-Ni-MoO<sub>2</sub>/CC. XRD pattern of a) CMP-MoO<sub>2</sub>/CC, b) CMP-Ni /CC, and c) CMP-Ni-MoO<sub>2</sub>/CC.



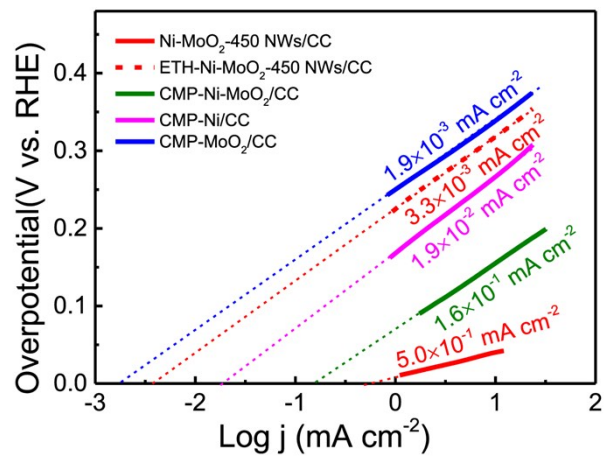

**Figure S8.** Exchange current densities for Ni-MoO<sub>2</sub>-450 NWs/CC, ETH-Ni-MoO<sub>2</sub>-450 NWs/CC, CMP-Ni-MoO<sub>2</sub>/CC, CMP-MoO<sub>2</sub>/CC, and CMP-Ni/CC in 1 M KOH, which were calculated from Tafel plots by extrapolation method.

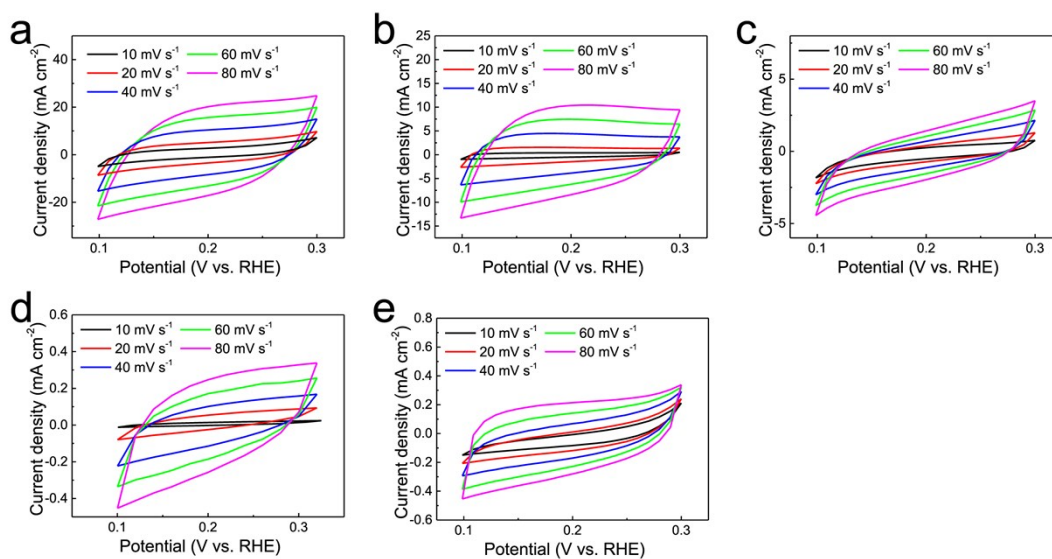

**Figure S9.** Electrochemically active surface area measurements. CV curves measured from 10 to 80  $\text{mV s}^{-1}$  in 1 M KOH of CV curves measured from 10 to 80  $\text{mV s}^{-1}$  of a) Ni-MoO<sub>2</sub>-450 NWs/CC, b) ETH-Ni-MoO<sub>2</sub>-450 NWs/CC, c) CMP-Ni-MoO<sub>2</sub>/CC, d) CMP-MoO<sub>2</sub>/CC, and e) CMP-Ni/CC.

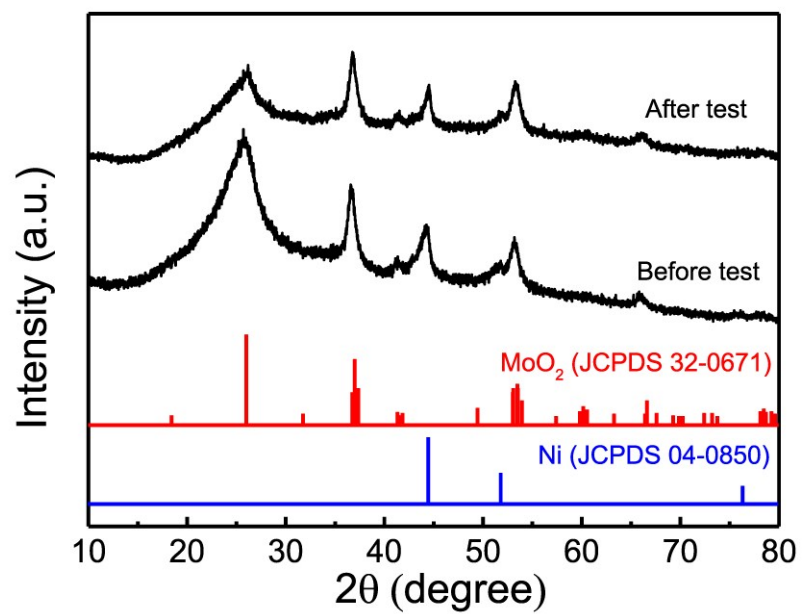

**Figure S10.** XRD patterns of Ni-MoO<sub>2</sub>-450 NWs/CC before and after the multi-current-step measurement.

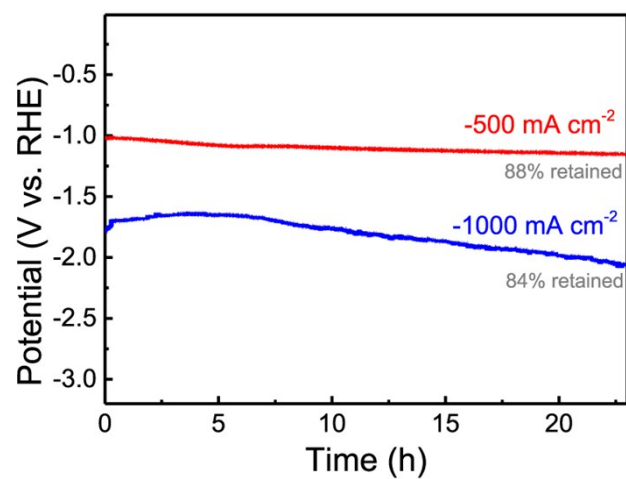

**Figure S11.** Chronoamperometry measurement at a static current density of -500 and -1,000 mA cm<sup>-2</sup> in 1 M KOH for more than 20 hours without  $iR$  correction.

**Table S1.** Summary of Ni-MoO<sub>2</sub> NWs/CC annealed at different temperature.

| Materials                       | Annealing temperature (°C) | Crystallinity | Chemical composition     | $\eta_{10}$ (mV) | Tafel slope (mV dec <sup>-1</sup> ) |
|---------------------------------|----------------------------|---------------|--------------------------|------------------|-------------------------------------|
| Ni-MoO <sub>2</sub> -350 NWs/CC | 350                        | Low           | Ni/MoO <sub>2</sub>      | 56               | 42                                  |
| Ni-MoO <sub>2</sub> -450 NWs/CC | 450                        | Middle        | Ni/MoO <sub>2</sub>      | 40               | 30                                  |
| Ni-MoO <sub>2</sub> -550 NWs/CC | 550                        | High          | MoNi/Ni/MoO <sub>2</sub> | 55               | 38                                  |

**Table S2.** The HER activities of the Ni-MoO<sub>2</sub>-450 NWs/CC and reported catalysts in 1 M KOH.

| Materials                                        | Onset overpotential (mV) | Overpotential at 10 mA cm <sup>-2</sup> (mV) | Tafel slope (mV dec <sup>-1</sup> ) | Reference        |
|--------------------------------------------------|--------------------------|----------------------------------------------|-------------------------------------|------------------|
| Ni-MoO <sub>2</sub> -450 NWs/CC                  | 0                        | 40                                           | 30                                  | <b>This work</b> |
| MoNi <sub>4</sub> on MoO <sub>2</sub>            | 0                        | 15                                           | 30                                  | 1                |
| MoS <sub>2</sub> /Ni <sub>3</sub> S <sub>2</sub> | 50                       | 110                                          | 83                                  | 2                |
| Ni(OH) <sub>2</sub> /MoS <sub>2</sub>            | 20                       | 80                                           | 60                                  | 3                |
| MoC-Mo <sub>2</sub> C                            | 33                       | 120                                          | 42                                  | 4                |
| Ni-MoC                                           | -                        | 123                                          | 83                                  | 5                |
| MoP                                              | 50                       | 130                                          | 48                                  | 6                |
| Ni <sub>2</sub> P/Ni                             | 41                       | ~75                                          | 50                                  | 7                |
| N,P-doped Mo <sub>2</sub> C@carbon nanospheres   | 0                        | 50                                           | 71                                  | 8                |
| NiMoN                                            | 50                       | 109                                          | 95                                  | 9                |
| Ni-WN                                            | 0                        | 47                                           | 71                                  | 10               |
| Co/Co <sub>3</sub> O <sub>4</sub>                | 30                       | ~90                                          | 44                                  | 11               |

## References

- 1 J. Zhang, T. Wang, P. Liu, Z. Liao, S. Liu, X. Zhuang, M. Chen, E. Zschech and X. Feng, *Nat. Commun.*, 2017, **8**, 15437.
- 2 J. Zhang, T. Wang, D. Pohl, B. Rellinghaus, R. Dong, S. Liu, X. Zhuang and X. Feng, *Angew. Chem. Int. Ed.*, 2016, **55**, 6702–6707.
- 3 B. Zhang, J. Liu, J. Wang, Y. Ruan, X. Ji, K. Xu, C. Chen, H. Wan, L. Miao and J. Jiang, *Nano Energy*, 2017, **37**, 74–80.
- 4 H. Lin, Z. Shi, S. He, X. Yu, S. Wang, Q. Gao and Y. Tang, *Chem Sci*, 2016, **7**, 3399–3405.
- 5 X. Xu, F. Nosheen and X. Wang, *Chem. Mater.*, 2016, **28**, 6313–6320.
- 6 P. Xiao, M. A. Sk, L. Thia, X. Ge, R. J. Lim, J.-Y. Wang, K. H. Lim and X. Wang, *Energy Env. Sci*, 2014, **7**, 2624–2629.
- 7 Y. Shi, Y. Xu, S. Zhuo, J. Zhang and B. Zhang, *ACS Appl. Mater. Interfaces*, 2015, **7**, 2376–2384.
- 8 Y.-Y. Chen, Y. Zhang, W.-J. Jiang, X. Zhang, Z. Dai, L.-J. Wan and J.-S. Hu, *ACS Nano*, 2016, **10**, 8851–8860.
- 9 Y. Zhang, B. Ouyang, J. Xu, S. Chen, R. S. Rawat and H. J. Fan, *Adv. Energy Mater.*, 2016, **6**, 1600221.
- 10 Z. Xing, D. Wang, Q. Li, A. M. Asiri and X. Sun, *Electrochimica Acta*, 2016, **210**, 729–733.
- 11 X. Yan, L. Tian, M. He and X. Chen, *Nano Lett.*, 2015, **15**, 6015–6021.
